# Supplementary material for: ALKBH5 Promotes Multiple Myeloma Tumorigenicity through inducing m6A-demethylation of SAV1 mRNA and Myeloma Stem Cell Phenotype
Source: PubMed Central journal article supplement (PMC8990482; doi:10.7150/ijbs.64943), 2022-03-06
Supplement: ijbsv18p2235s1.pdf [file ijbsv18p2235s1.pdf]

## Supplemental files

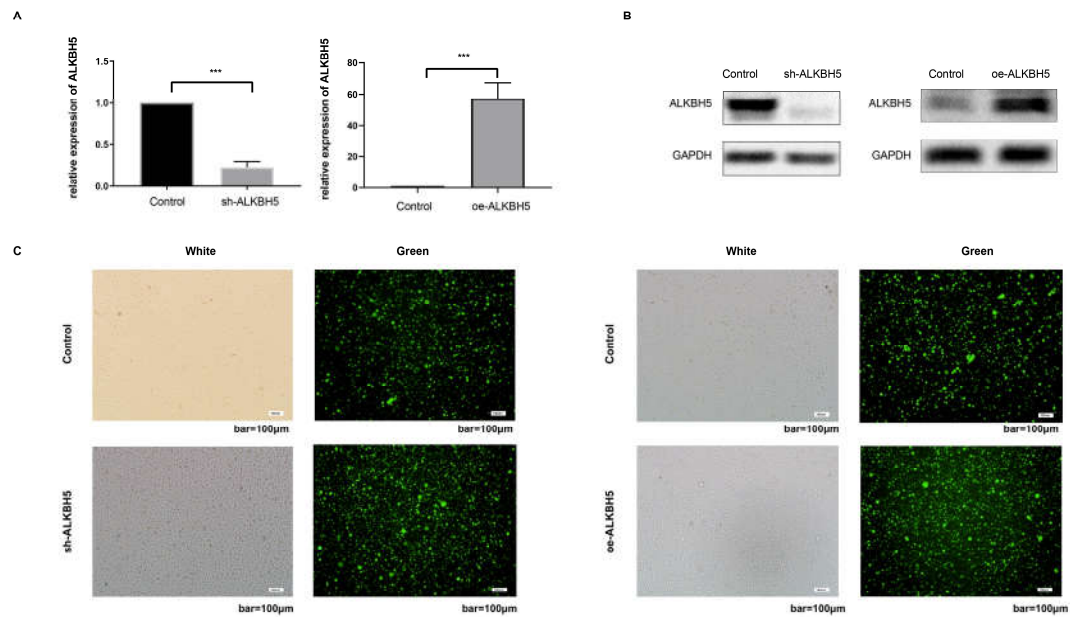

**Figure S1. The transfection efficiency of lentivirus in RPMI8226 cells**

(A) The ALKBH5 mRNA level in oe-ALKBH5 and sh-ALKBH5 RPMI8226 cells. (B) The expression levels of ALKBH5 in oe-ALKBH5 and sh-ALKBH5 myeloma cells. (C) Representative images of transfected RPMI8226 cells under fluorescence microscopy. White: general microscopy field, Green: fluorescence microscopy field, bar=100µm\*\*\*P<0.001.

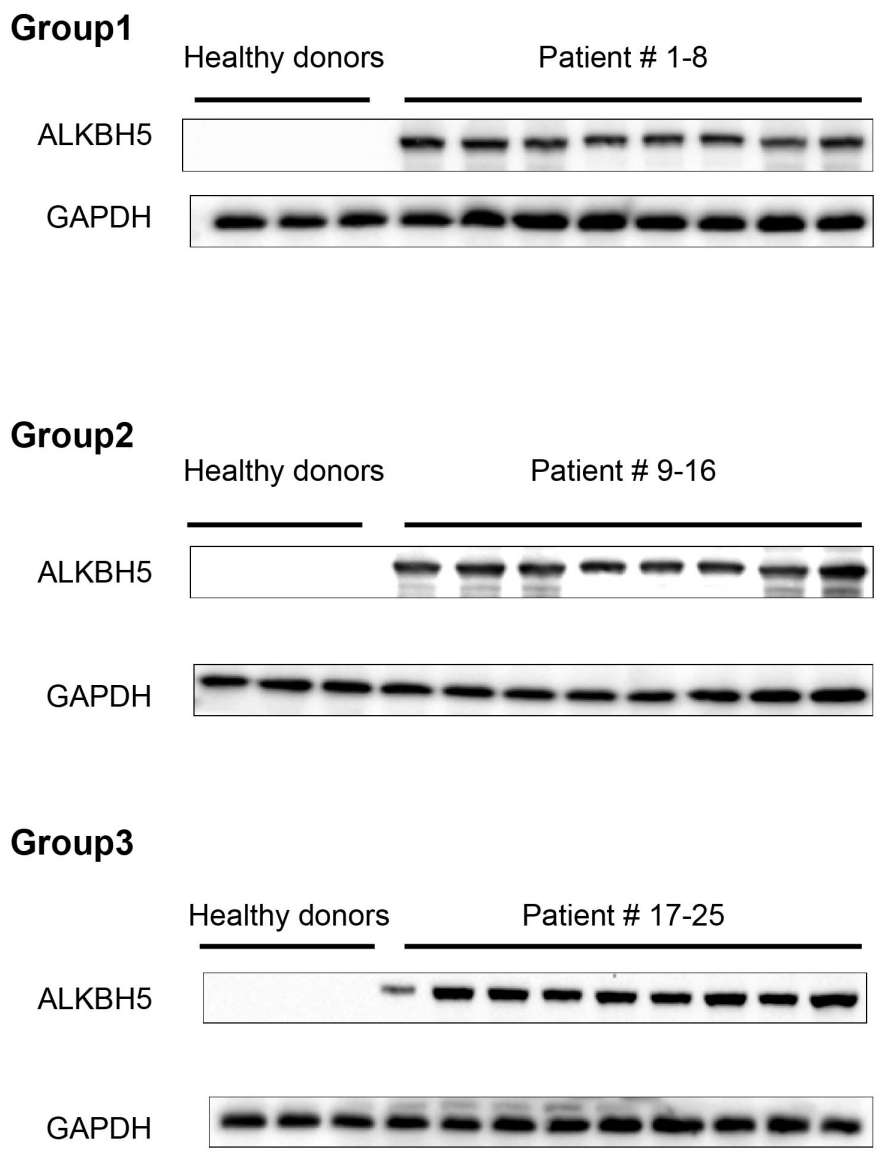

**Figure S2. The expression of ALKBH5 from individual patient examined by western blot**

| Patient | Gender | Age<br>(year) | MM<br>stage<br>(ISS) | LDH<br>(U/L) | $\beta$ 2-MG<br>(mg/L) | Serum<br>Albumin<br>(g/L) | MM-FISH           |
|---------|--------|---------------|----------------------|--------------|------------------------|---------------------------|-------------------|
| 1       | female | 50            | II                   | 75           | 4.7                    | 23.3                      | t(4;14)(p16;q32)  |
| 2       | male   | 68            | III                  | 90           | 7.5                    | 24.5                      |                   |
| 3       | female | 71            | I                    | 139          | 1.9                    | 39.6                      |                   |
| 4       | male   | 65            | I                    | 187          | 1.4                    | 38.5                      |                   |
| 5       | female | 69            | I                    | 89           | 3.2                    | 36                        | t(4;14)(p16;q32)  |
| 6       | female | 57            | III                  | 305          | 17.1                   | 38.6                      | t(4;14)(p16;q32)  |
| 7       | male   | 57            | I                    | 149          | 1.2                    | 43                        |                   |
| 8       | female | 74            | II                   | 300          | 3.9                    | 19                        |                   |
| 9       | female | 73            | III                  | 325          | 13.1                   | 27.7                      | t(4;14)(p16;q32)  |
| 10      | female | 63            | III                  | 225          | 59.3                   | 21.4                      |                   |
| 11      | female | 57            | II                   | 320          | 4.3                    | 20                        |                   |
| 12      | female | 71            | I                    | 197          | 2.2                    | 36.7                      |                   |
| 13      | female | 69            | III                  | 288          | 3.6                    | 30.9                      |                   |
| 14      | female | 69            | I                    | 99           | 3.1                    | 37.8                      |                   |
| 15      | female | 56            | II                   | 165          | 5.1                    | 35                        |                   |
| 16      | male   | 59            | III                  | 340          | 7.5                    | 18.6                      |                   |
| 17      | female | 59            | I                    | 125          | 1.6                    | 32.7                      |                   |
| 18      | female | 71            | I                    | 150          | 2.5                    | 41.2                      |                   |
| 19      | female | 74            | II                   | 136          | 4.7                    | 32.5                      |                   |
| 20      | male   | 81            | III                  | 129          | 8.5                    | 35.1                      |                   |
| 21      | female | 68            | I                    | 205          | 1.8                    | 36.1                      |                   |
| 22      | female | 69            | III                  | 166          | 7.6                    | 32                        | t(11;14)(q13;q32) |
| 23      | female | 64            | I                    | 254          | 2.8                    | 39.5                      |                   |
| 24      | male   | 65            | III                  | 183          | 13                     | 28.8                      |                   |
| 25      | male   | 66            | III                  | 220          | 5.6                    | 17.9                      |                   |

**Table S1. The patients' information**

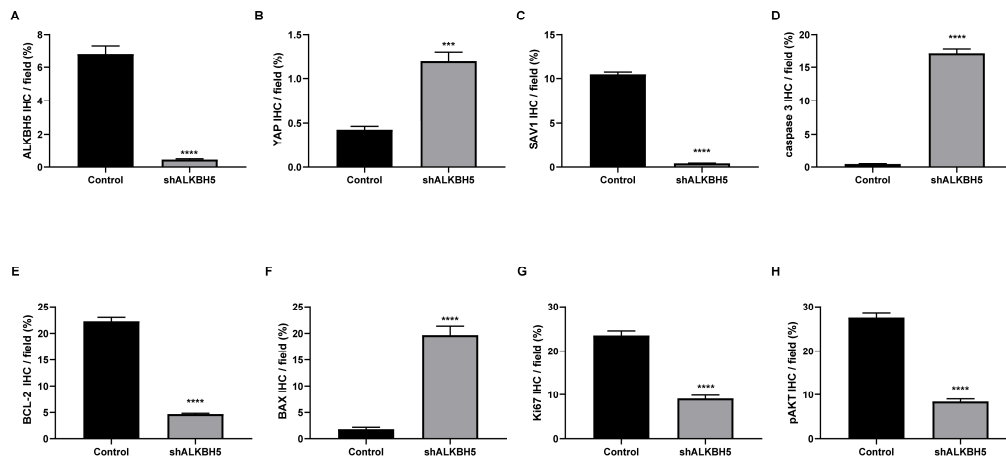

**Figure S3. Stastical diaram of the IHC result of figure 3C**

(A)-(F) Qualification of ALKBH5, YAP, SAV1, caspase 3, BCL-2, BAX, Ki67 and pAKT IHC result

in the ALKBH5<sup>-</sup> and control cell populations. \*\*\*P<0.001, \*\*\*\*P<0.0001.

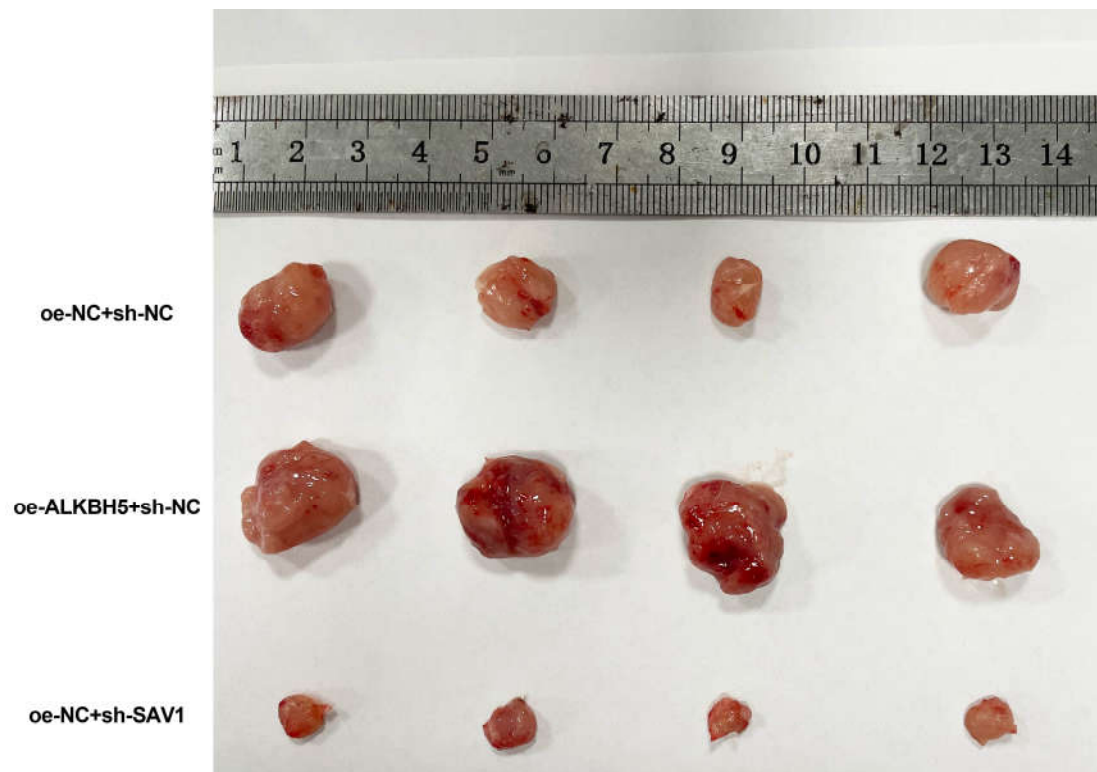

**Figure S4. The in vivo cell derived xenograft models showed that tumors from oe-ALKBH5+sh-NC group had an increase in tumor volume and significantly delayed in ALKBH5-overexpression and SAV1-silencing group.**
